# Supplementary material for: Developing a Mathematical Model of Intracellular Calcium Dynamics for Evaluating Combined Anticancer Effects of Afatinib and RP4010 in Esophageal Cancer
Source: MDPI journal article supplement (doi:10.3390/ijms23031763), 2022-02-03
Supplement: s1 [file s1]

## Supplementary Materials

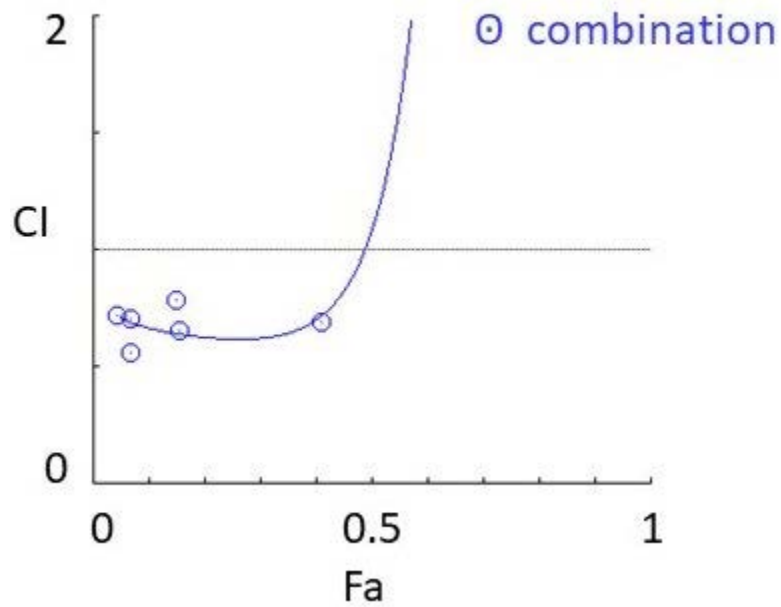

**Figure S1.** Combination Index (CI) Plot for combined effect of RP4010 and afatinib on the effect of  $\text{Ca}^{2+}$  oscillations in KYSE-150 cells. Each blue circle indicated a data point with combined RP4010 and afatinib. Simulation curve is showed in blue line. Average effect values (Fa) is showed in x-axis.

**Table S1.** Dose-dependent drug effects on intracellular Ca<sup>2+</sup> oscillations in KYSE-70 cells (experimental data).

| Drug concentration (μM) | Period (s)<br>mean ± s.e.m |            |
|-------------------------|----------------------------|------------|
|                         | RP4010                     | Afatinib   |
| 5                       | 68.7 ± 3.2                 |            |
| 2.5                     | 58.0 ± 5.4                 | 68 ± 5.3   |
| 1.25                    | 49.9 ± 2.7                 | 53.7 ± 1.5 |
| 0.625                   |                            | 51.9 ± 1.1 |
| 0.0                     | 39.4 ± 1.5                 |            |

**Table S2.** Effects on intracellular Ca<sup>2+</sup> oscillations by combined RP4010 and Afatinib in KYSE-70 cells (experimental data).

| Concentration of Combined Drugs (μM) |          | Period (s) |
|--------------------------------------|----------|------------|
| RP4010                               | Afatinib |            |
| 5                                    | 2.5      | 75.5 ± 7.7 |
| 2.5                                  | 1.25     | 68.1 ± 4.5 |
| 1.25                                 | 0.625    | 59.2 ± 2.2 |
